# Supplementary material for: Au nanoparticle decoration of nanoparticular and nanotubular TiO2 using atmospheric pressure cold plasma for photocatalytic applications
Source: Royal Society of Chemistry journal article supplement (doi:10.1039/d4cy00345d), 2024-01-01
Supplement: d4cy00345d1.pdf [file d4cy00345d1.pdf]

## Au nanoparticles decoration of nanoparticular and nanotubular TiO<sub>2</sub> using atmospheric pressure cold plasma for photocatalytic applications

A. Bjelajac<sup>1</sup>, R. Petrovic<sup>2</sup>, M. Stefanovic<sup>3</sup>, A.-M. Phillipe<sup>1</sup>, Y. Fleming<sup>1</sup>, J. Guillot<sup>1</sup>, J.-B. Chemin<sup>1</sup>, P. Choquet<sup>1</sup>, Joris Kadok<sup>1</sup> and S. Bulou<sup>1</sup>

<sup>1</sup> Luxembourg Institute of Science and Technology, 28, avenue des Hauts-Fourneaux, L-4365 Esch-sur-Alzette, Luxembourg

<sup>2</sup> University of Belgrade, Faculty of Technology and Metallurgy, Karnegijeva 4, 11000 Belgrade, Serbia

<sup>3</sup> University of Belgrade, Innovation Centre of the Faculty of Technology and Metallurgy, Karnegijeva 4, 11000 Belgrade, Serbia

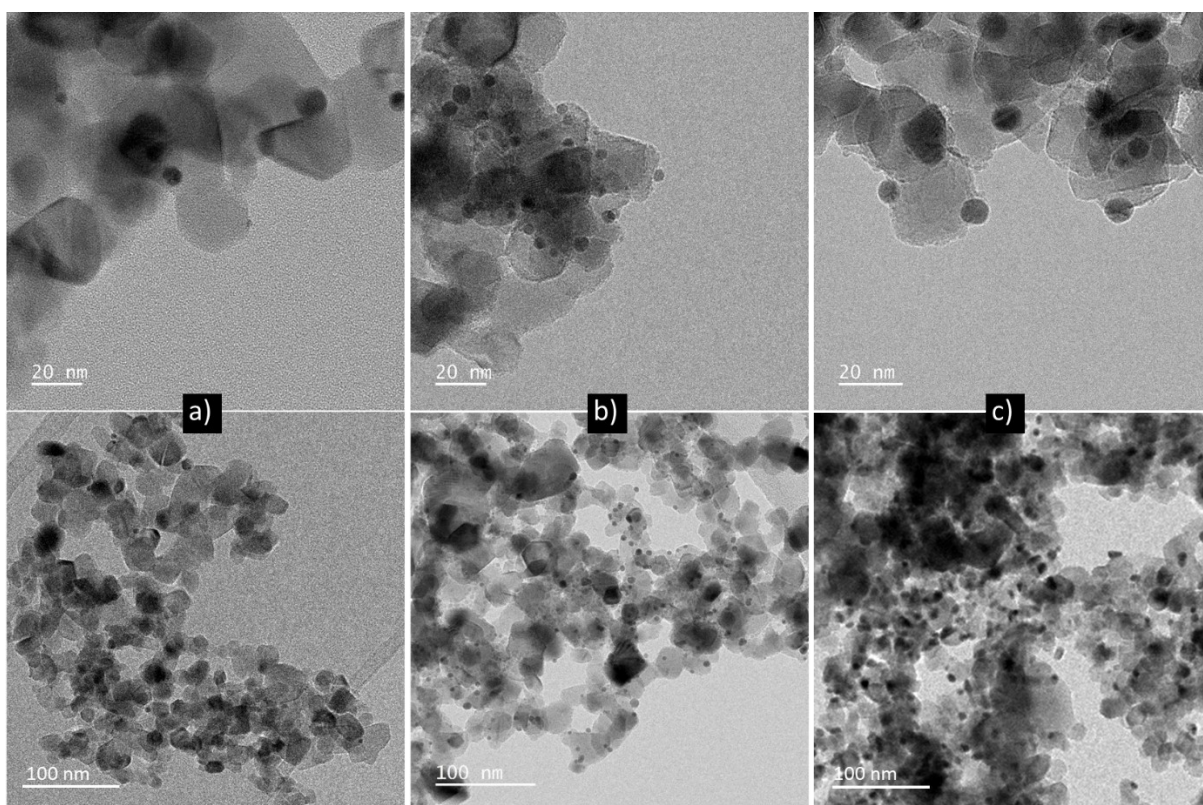

Fig. S1 TEM micrographs of P25 after: a) 0.5-h, b) 1-h and c) 1.5-h Au plasma deposition

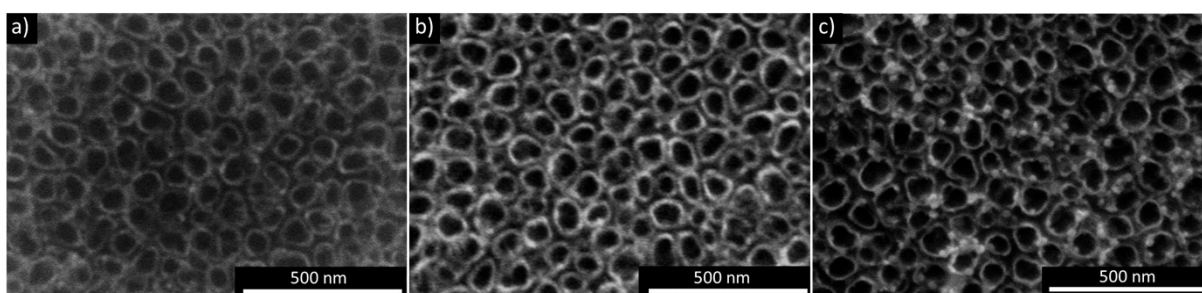

Fig. S2 SEM micrographs of TiO<sub>2</sub> NTs after: a) 2-min, b) 5-min and c) 10-min Au plasma deposition
